# Supplementary material for: Local transmural action potential gradients are absent in the isolated, intact dog heart but present in the corresponding coronary‐perfused wedge
Source: PubMed Central journal article supplement (PMC5449556; doi:10.14814/phy2.13251), 2017-05-29

# Supplemental Figure 1

**A**

Intact heart (LV)  
(Needle 7)

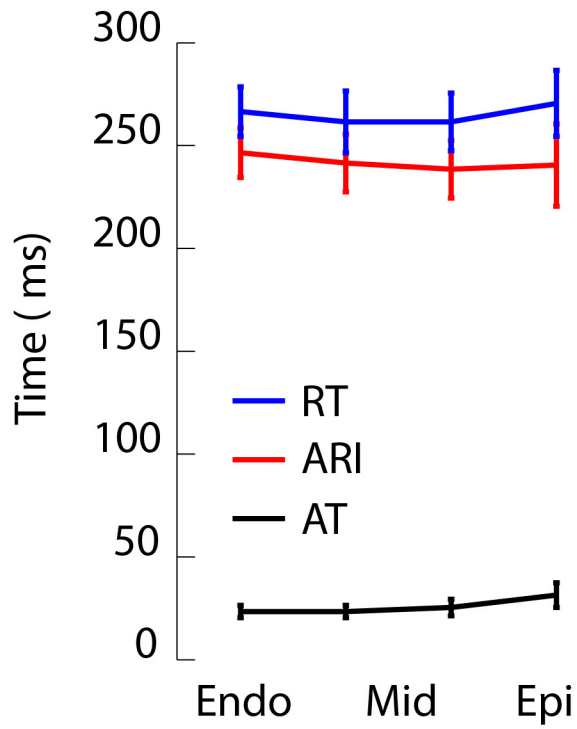

**B**

Poincaré plot

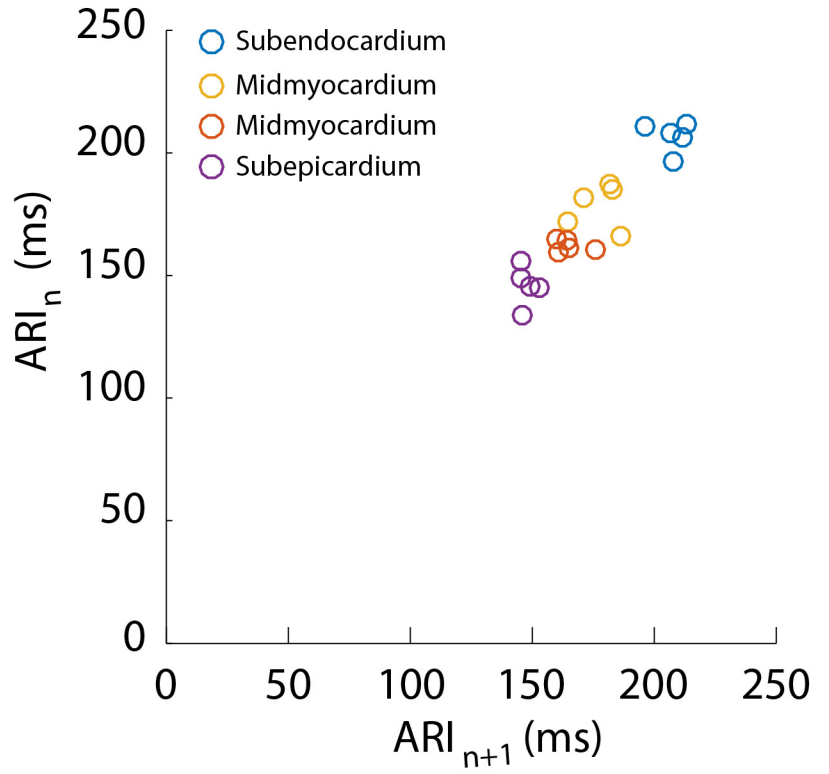

# Supplemental Figure 2

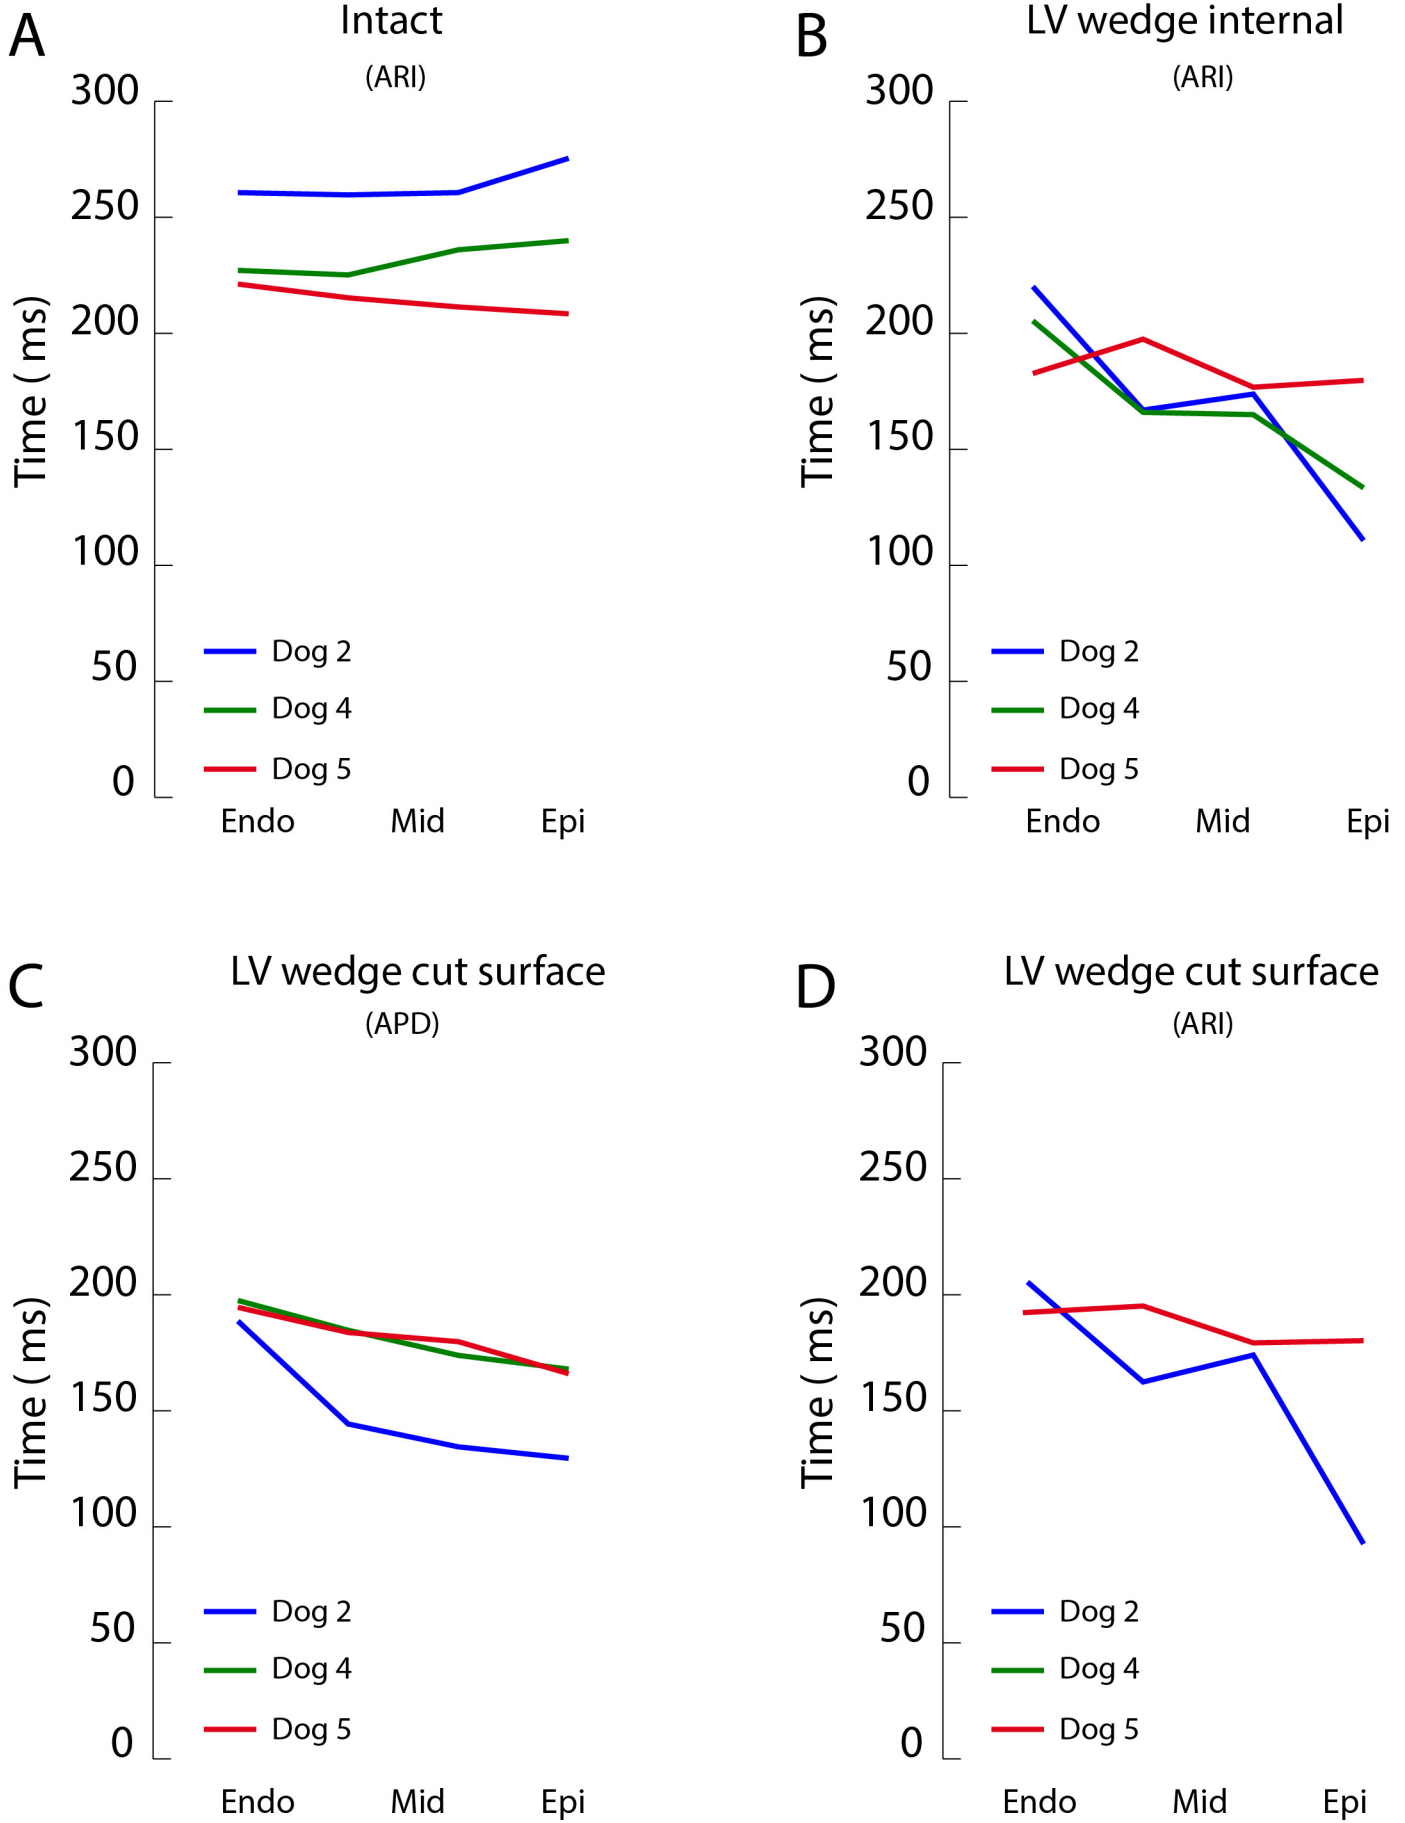

# Supplemental Figure 3

**A** Unipolar electrograms (LV)  
Cut surface

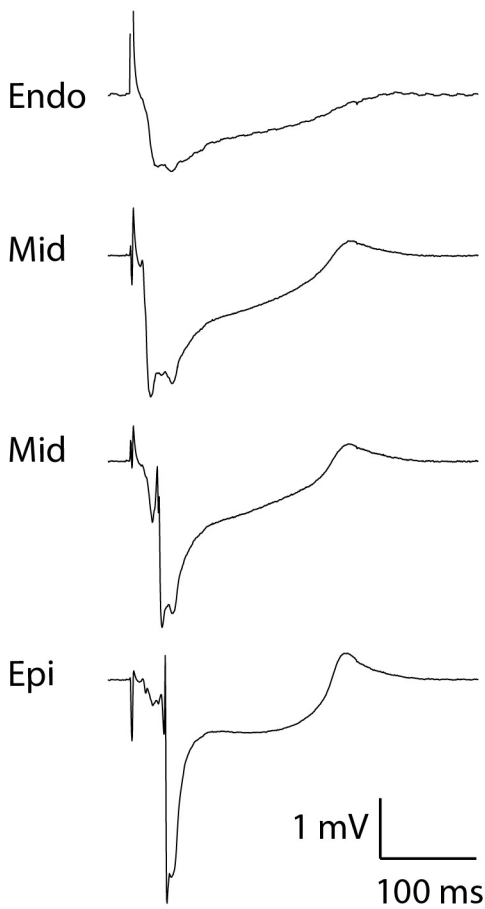

**B** ARI: Internal vs Cut surface

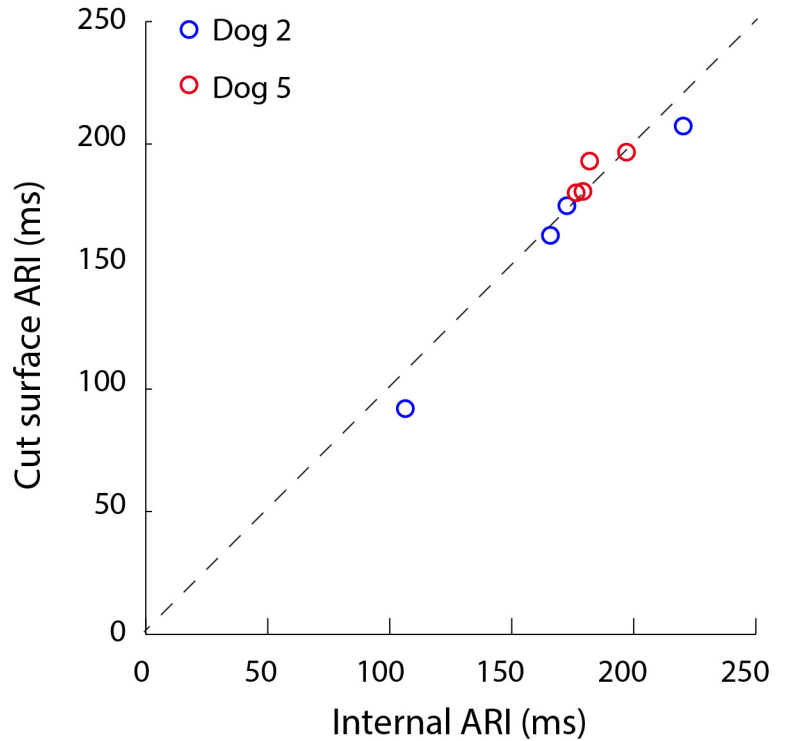

**C** Restitution curve  
(Electrical recordings)

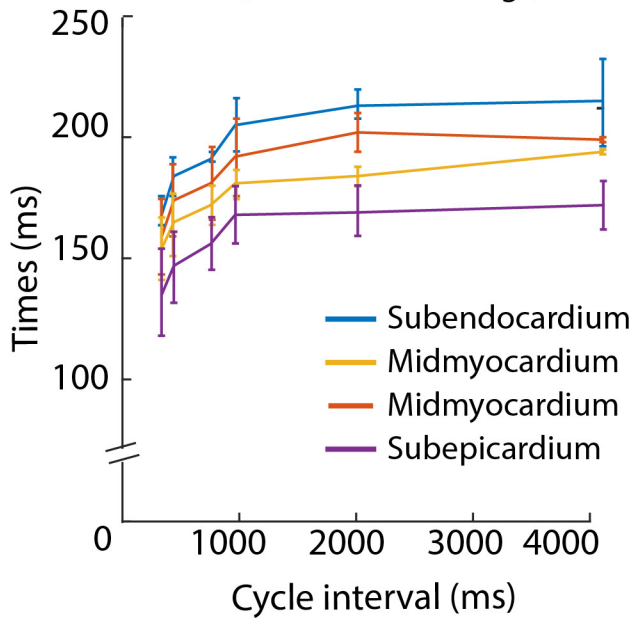

Supplement: PHY2-5-e13251-s001.pdf [file PHY2-5-e13251-s001.pdf]
